# Supplementary material for: A facile oxidation–dehydration reaction-driven robust porous copper oxide nanobelt coating on copper foam for an energy-saving and low-cost urea oxidization reaction
Source: Royal Society of Chemistry journal article supplement (doi:10.1039/c9cc07454f), 2019-01-01
Supplement: c9cc07454f1.pdf [file c9cc07454f1.pdf]

## **Electronic Supplementary Information**

### **Facile oxidation-dehydration reaction-driven robust porous copper oxide nanobelt coating on copper foam for energy-saving and low-cost urea oxidization reaction**

Yanqing Wang<sup>a</sup>, Yuemeng Li<sup>a</sup>, Liping Ding<sup>b</sup>, Jun Ding<sup>a,\*</sup>

<sup>a</sup> Department of Materials Science & Engineering, National University of Singapore, 117575,

Singapore

<sup>b</sup> School of Chemistry and Chemical Engineering, Nantong University, Nantong 226007, China

## **Experimental Section**

### **Materials**

Cu foam(CF) was purchased from Latech Scientific Supply Pte. Ltd.  $K_2S_2O_8$  ( $\geq 99.0\%$ ), KOH, ethyl alcohol and  $H_2SO_4$ (95-98wt%) were bought from Sigma-Aldrich Chemical Reagent Co.

### **Fabrication of CuO nanobelt coating**

CuO nanobelt coating was synthesized as follows. In a typical preparation, to remove the oil on copper surface, CF was immersed into ethyl alcohol for 2 min at room temperature. Then CF was dipped into 5 volume%  $H_2SO_4$  solution for 2min at room temperature to remove the oxide layer of copper substrate surface. At last, CF was immersed into chemical oxidization solution for 10min at  $50^\circ C$ . Chemical oxidization solution contains 2mol/L KOH and 0.05mol/L  $K_2S_2O_8$ . Please confirm that  $K_2S_2O_8$  powder is completely dissolved and the as-prepared chemical oxidization solution is clarified. Moreover, deionized water was used to clean CF completely for several times among the above two processes.

### **Characterizations**

ZEISS SEM Supra 40 was employed to observe the microstructure of different samples. XRD patterns were determined by Bruker D8 Advanced Diffractometer System. X-ray photoelectron spectroscopy (XPS, Kratos AXIS Ultra DLD) was carried out to detect the surface element analysis of varied samples.

### **Electrochemical measurements**

The typical three-electrode cell connected to a Bio-logic VMP 3 was used to determine UOR process. In this cell, the CuO nanobelt/CF, Pt and Hg/HgO were employed as the working electrode ( $1 \times 1 \text{ cm}^2$ ), a counter electrode and a reference electrode, respectively. The electrolyte is 1M KOH solution (contain 0.5M urea) and the pH value of electrolyte is 14. According to  $E(\text{RHE}) = E_{\text{Hg/HgO}} + 0.059\text{pH} + 0.098 \text{ V}$ , all the measured potential values were converted to reversible hydrogen electrodes (RHE) standard. LSV curves were determined with the scan rates of 1mV/s. Tafel slopes were calculated and derived from LSV curves. Notably, all the electrochemical datas were shown after 100% IR compensation.

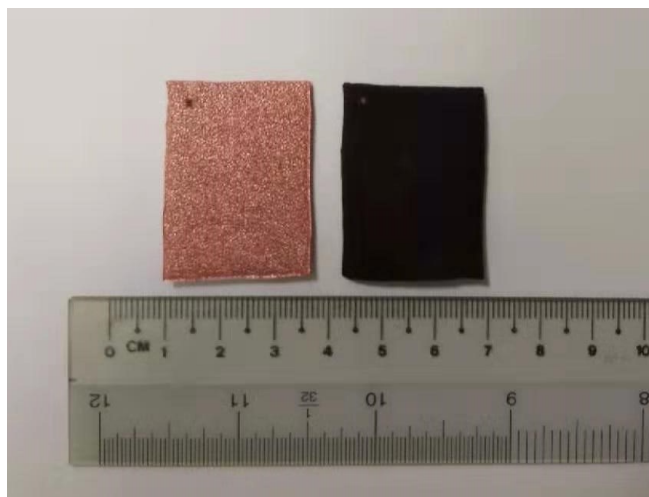

**Figure S1** the digital photos of Cu foam after pretreatment(left) and CuO nanobelt coating(right)

**Table S1** element atomic content of the surface layer of CuO nanobelt coating by XPS analysis.

| <b>Element</b> | <b>Atomic/%</b> |
|----------------|-----------------|
| <b>Cu K</b>    | <b>39.2</b>     |
| <b>O K</b>     | <b>60.8</b>     |
| <b>Total</b>   | <b>100.00</b>   |

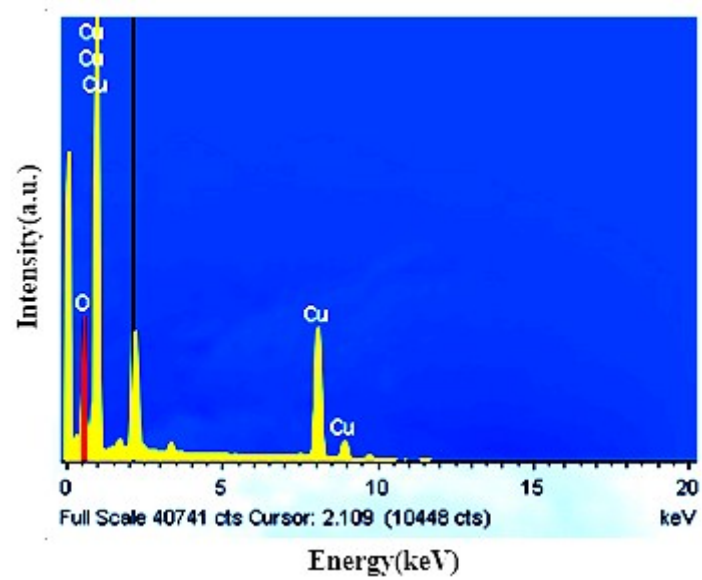

**Figure S2** EDS test results of CuO nanobelt coating

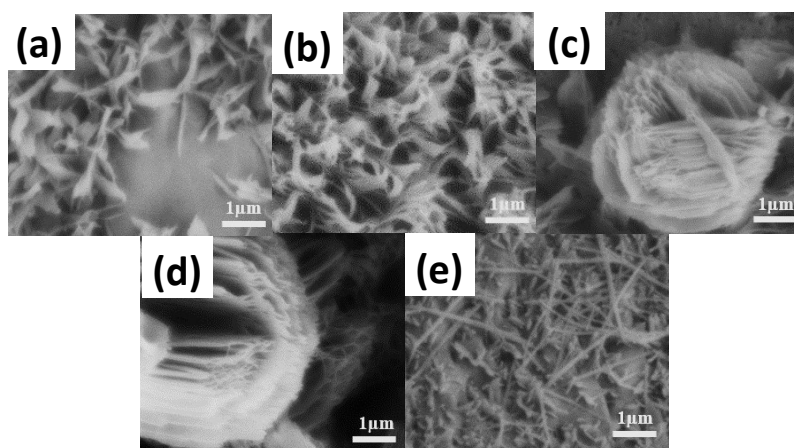

**Figure S3** The influence of different reaction time on the morphology of CuO nanobelt coating (a)

5min (b) 10min (c) 20min (d) 40min (e) 80min

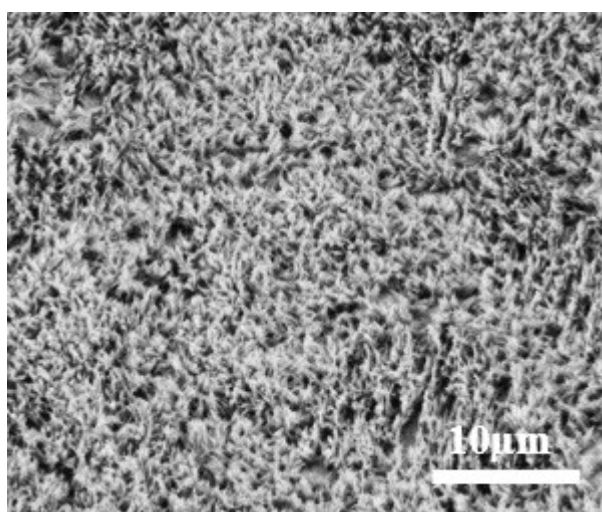

**Figure S4** SEM image of CuO nanobelt coating after UOR stability test( $15\text{mA}/\text{cm}^2 \times 10\text{h}$ ).



## Supplementary METHODS

### Calculation of electrochemically active surface area (*ECSA*)

According to the below equation:

$$C_{dl} = J_c \div v \quad (1)$$

The electrochemical double-layer capacitance  $C_{dl}$  of electrode is calculated.

The charge current  $J_c$  was derived from CV curves in the non-Faradaic capacitance current range.  $v$  is the scan rate as shown in **Fig 4a**.

**Fig 4b** shows that  $C_{dl}$  value of CuO nanobelt/CF electrode is 8.38mF.

According to as-reported literatures, the electrochemically active surface area *ECSA* of electrode is determined as the below equation:

$$ECSA = C_{dl} \div C_s \quad (2)$$

According to the literatures, the specific capacitance value of the sample  $C_s$  is 0.040 mF/cm<sup>2</sup>, so the *ECSA* of CuO nanobelt/CF electrode is 209.5cm<sup>2</sup>.

**Table S2.** Summary of UOR catalysis activity of CuO nanobelt coating and as-reported UOR catalysts in 1M KOH+0.5M urea electrolyte

| Catalyst                                      | $j$<br>[mA<br>/cm <sup>2</sup> ] | potential (vs RHE)[V]<br>@ $j$ | Tafel<br>slope<br>(mV<br>/dec) | Substrate | Ref                                           |
|-----------------------------------------------|----------------------------------|--------------------------------|--------------------------------|-----------|-----------------------------------------------|
| CuO Nanobelt                                  | 10                               | 1.39                           | 28                             | CF        | This work                                     |
|                                               | 100                              | 1.43                           |                                |           |                                               |
| Pt                                            | 10                               | 1.50                           | -                              | Ti foil   | <i>Chem. Commun.</i> , 2009, 32, 4859.        |
| Rhodium-Ni                                    | 10                               | 1.47                           | -                              | Ni foil   | <i>J. Appl. Electrochem.</i> 2012, 42, 925    |
| r-NiMoO <sub>4</sub> /NF                      | 100                              | 1.50                           | 32.5                           | NF        | <i>ACS Catal.</i> 2018, 8, 1                  |
| Ni <sub>2</sub> P NF/CC                       | 100                              | 1.51                           | 49                             | CC        | <i>J. Mater. Chem. A</i> , 2017, 5, 3208.     |
| Ni-Mo alloy                                   | 10                               | 1.36                           | 22                             | NF        | <i>Nano Energy</i> 2019, 60, 894              |
|                                               | 100                              | 1.44                           |                                |           |                                               |
| MnO <sub>2</sub> /MnCoO <sub>4</sub> @Ni foam | 10                               | 1.33                           | 72 ± 0.94                      | NF        | <i>J. Mater. Chem. A</i> , 2017, 5, 7825.     |
|                                               | 100                              | 1.44                           |                                |           |                                               |
| NF/NiMoO-Ar                                   | 10                               | 1.37                           | 19                             | NF        | <i>Energy Environ. Sci.</i> , 2018, 11, 1890. |
|                                               | 100                              | 1.42                           |                                |           |                                               |
| NiCoP/CC                                      | 10                               | 1.30                           | 49                             | CC        | <i>J. Mater. Chem. A</i> , 2019, 7, 9078.     |
|                                               | 100                              | 1.57                           |                                |           |                                               |

|                                    |     |      |    |    |                                                      |
|------------------------------------|-----|------|----|----|------------------------------------------------------|
| S-MnO <sub>2</sub> -G-NF           | 10  | 1.33 | 75 | NF | <i>Angew. Chem. Int. Ed.</i> 2016, <b>55</b> , 3804. |
|                                    | 100 | 1.47 |    |    |                                                      |
| CoS <sub>2</sub> -MoS <sub>2</sub> | 10  | 1.29 | 32 | NF | <i>Adv. Energy Mater.</i> 2018, <b>8</b> , 1801775   |
|                                    | 100 | 1.33 |    |    |                                                      |

Note: Pt and Rhodium-Ni for UOR (electrolyte:5M KOH+0.33M urea)

NF: nickel foam,

CC: Carbon cloth

CF: copper foam

## REFERENCES

1. J. -Y. Zhang, T. He, M. Wang, R. Qi, Y. Yan, Z. Dong, H. Liu, H. Wang and B. Y. Xia, *Nano Energy*, 2019, **60**, 894.
2. Y. Tong, P. Chen, M. Zhang, T. Zhou, L. Zhang, W. Chu, C. Wu and Y. Xie, *ACS Catal.*, 2018, **8**, 1.
3. D. Liu, T. Liu, L. Zhang, F. Qu, G. Du, A. M. Asiri and X. Sun, *J. Mater. Chem. A*, 2017, **5**, 3208.
4. C. Xiao, S. Li, X. Zhang and D. R. MacFarlane, *J. Mater. Chem. A*, 2017, **5**, 7825.
5. Z. -Y. Yu, C. -C. Lang, M. -R. Gao, Y. Chen, Q. -Q. Fu, Y. Duan and S. -H. Yu, *Energy Environ. Sci.*, 2018, **11**, 1890.
6. L. Sha, J. Yin, K. Ye, G. Wang, K. Zhu, K. Cheng, J. Yan, G. Wang and D. Cao, *J. Mater. Chem. A*, 2019, **7**, 9078.
7. S. Chen, J. Duan, A. Vasileff and S. Z. Qiao, *Angew. Chem. Int. Ed.*, 2016, **55**, 3804.
8. C. Li, Y. Liu, Z. Zhuo, H. Ju, D. Li, Y. Guo, X. Wu, H. Li and T. Zhai, *Adv. Energy Mater.*, 2018, **8**, 1801775.
